# Supplementary material for: A guide to the selection of switchable functional groups for CO2-switchable compounds
Source: Royal Society of Chemistry journal article supplement (doi:10.1039/c6cp03302d), 2016-01-01
Supplement: c6cp03302d1.pdf [file c6cp03302d1.pdf]

## SUPPLEMENTARY INFORMATION FOR

# A Guide to the Selection of Switchable Functional Groups for CO<sub>2</sub>-Switchable Compounds

A. K. Alshamrani, J. R. Vanderveen and P. G. Jessop

## Contents

1. Derivations of equations in Scenario 1
2. Derivations of equations in Scenario 2
3. Derivations of equations in Scenario 3
4. Additional information concerning Scenario 1
5. Additional information concerning Scenario 2
6. Additional information concerning Scenario 3

## 1. Derivations of equations in Scenario 1

### 1.1 Derivation of equation 9 (pH of amine/water mix)

$$K_{aH} = \frac{[B]_{aq}[H_3O^+]_{aq}}{[BH^+]_{aq}}$$

For the rest of the derivations in water, the subscript "aq" will be dropped for simplicity.

$$K_w = [H_3O^+][OH^-]$$

$$\begin{aligned} \text{charge balance in water:} \quad [BH^+] + [H_3O^+] &= [OH^-] \\ [BH^+] &= [OH^-] - [H_3O^+] \\ [BH^+] &= K_w/[H_3O^+] - [H_3O^+] \end{aligned}$$

$$\text{initial conc of base} = [B]_0 = [B] + [BH^+]$$

$$[B]_0 = K_{aH}[BH^+]/[H_3O^+] + [BH^+]$$

$$[B]_0 = K_{aH}(K_w/[H_3O^+] - [H_3O^+])/[H_3O^+] + K_w/[H_3O^+] - [H_3O^+]$$

$$[B]_0 = K_{aH}K_w/[H_3O^+]^2 - K_{aH} + K_w/[H_3O^+] - [H_3O^+]$$

$$[B]_0[H_3O^+]^2 = K_{aH}K_w - K_{aH}[H_3O^+]^2 + K_w[H_3O^+] - [H_3O^+]^3$$

$$0 = [H_3O^+]^3 + [B]_0[H_3O^+]^2 + K_{aH}[H_3O^+]^2 - K_w[H_3O^+] - K_{aH}K_w$$

$$0 = [H_3O^+]^3 + [H_3O^+]^2(K_{aH} + [B]_0) - K_w[H_3O^+] - K_{aH}K_w$$

### 1.2 Derivation of equation 10 (%protonation of amine/water mix)

$$K_{aH} = \frac{[B][H_3O^+]}{[BH^+]}$$

$$\text{initial conc of base} = [B]_0 = [B] + [BH^+]$$

$$\text{fraction protonated} = [BH^+]/[B]_0$$

$$\text{fraction protonated} = [BH^+]/([B] + [BH^+])$$

$$\text{fraction protonated} = [B][H_3O^+]/K_{aH}([B] + [B][H_3O^+]/K_{aH})$$

$$\begin{aligned}\text{fraction protonated} &= [\text{H}_3\text{O}^+]/K_{\text{aH}}(1 + [\text{H}_3\text{O}^+]/K_{\text{aH}}) \\ \text{fraction protonated} &= [\text{H}_3\text{O}^+]/(K_{\text{aH}} + [\text{H}_3\text{O}^+]) \\ \% \text{ protonation} &= [\text{H}_3\text{O}^+]/(K_{\text{aH}} + [\text{H}_3\text{O}^+]) \times 100\%\end{aligned}$$

### 1.3 Calculation of $\text{pK}_{\text{aH}}$ required at very low $[\text{B}]_0$

In the special case of very low  $[\text{B}]_0$  in the absence of  $\text{CO}_2$ ,  $[\text{H}_3\text{O}^+] = 1 \times 10^{-7} \text{ M}$   
Therefore for 5% protonation:  
 $0.05 = 1 \times 10^{-7} / (K_{\text{aH}} + 1 \times 10^{-7})$   
 $0.05K_{\text{aH}} + 5 \times 10^{-9} = 1 \times 10^{-7}$   
 $0.05K_{\text{aH}} = 0.95 \times 10^{-7}$   
 $K_{\text{aH}} = 0.95 \times 10^{-7} / 0.05$   
 $\text{pK}_{\text{aH}} = 5.7$

In the special case of very low  $[\text{B}]_0$  under 1 bar of  $\text{CO}_2$ , the pH is the same as that of pure water under 1 bar of  $\text{CO}_2$ . That can be calculated as follows:

$$\begin{aligned}K_{\text{w}} &= [\text{H}_3\text{O}^+][\text{OH}^-] \\ K_{\text{a1}}^* &= [\text{H}_3\text{O}^+]_{\text{aq}} [\text{HCO}_3^-]_{\text{aq}} / ([\text{H}_2\text{CO}_3] + [\text{CO}_{2(\text{aq})}]) \\ K_{\text{H}} &= ([\text{H}_2\text{CO}_3] + [\text{CO}_{2(\text{aq})}]) / P_{\text{CO}_2} \\ \text{Charge balance: } [\text{H}_3\text{O}^+] &= [\text{OH}^-] + [\text{HCO}_3^-]\end{aligned}$$

$$\begin{aligned}K_{\text{a1}}^* &= ([\text{H}_3\text{O}^+][\text{HCO}_3^-]) / (K_{\text{H}} P_{\text{CO}_2}) \\ K_{\text{a1}}^* K_{\text{H}} P_{\text{CO}_2} &= [\text{H}_3\text{O}^+][\text{HCO}_3^-] \\ [\text{HCO}_3^-] &= K_{\text{a1}}^* K_{\text{H}} P_{\text{CO}_2} / [\text{H}_3\text{O}^+] \\ [\text{H}_3\text{O}^+] &= K_{\text{w}} / [\text{H}_3\text{O}^+] + K_{\text{a1}}^* K_{\text{H}} P_{\text{CO}_2} / [\text{H}_3\text{O}^+] \\ [\text{H}_3\text{O}^+]^2 &= K_{\text{w}} + K_{\text{a1}}^* K_{\text{H}} P_{\text{CO}_2} \\ [\text{H}_3\text{O}^+] &= (K_{\text{w}} + K_{\text{a1}}^* K_{\text{H}} P_{\text{CO}_2})^{0.5}\end{aligned}$$

at 25 °C and 0.1 MPa of  $\text{CO}_2$   
 $[\text{H}_3\text{O}^+] = (1 \times 10^{-14} \text{ M}^2 + 4.365 \times 10^{-7} \text{ M} \cdot 0.342 \text{ M/MPa} \cdot 0.1 \text{ MPa})^{0.5}$   
 $= 1.2218 \times 10^{-4} \text{ M} \text{ (pH} = 3.9\text{)}$

Therefore for 95% protonation, using equation 10:

$$\begin{aligned}\% \text{ protonation} &= \frac{[\text{H}_3\text{O}^+]}{[\text{H}_3\text{O}^+] + K_{\text{aH}}} \times 100\% \\ 0.95 &= 1.2218 \times 10^{-4} / (K_{\text{aH}} + 1.2218 \times 10^{-4}) \\ 0.95K_{\text{aH}} + 1.1607 \times 10^{-4} &= 1.2218 \times 10^{-4} \\ 0.95K_{\text{aH}} &= 6.109 \times 10^{-6} \\ K_{\text{aH}} &= 6.109 \times 10^{-6} / 0.95 = 6.43 \times 10^{-6} \\ \text{pK}_{\text{aH}} &= 5.2\end{aligned}$$

### 1.4 Derivation of equation 11 (pH of amine/water mix under $\text{CO}_2$ )

$$\begin{aligned}K_{\text{w}} &= [\text{H}_3\text{O}^+][\text{OH}^-] \\ K_{\text{a1}}^* &= [\text{H}_3\text{O}^+]_{\text{aq}} [\text{HCO}_3^-]_{\text{aq}} / ([\text{H}_2\text{CO}_3] + [\text{CO}_{2(\text{aq})}])\end{aligned}$$

$$K_{\text{aH}} = [\text{B}][\text{H}_3\text{O}^+] / [\text{BH}^+]$$

$$K_{\text{H}} = ([\text{H}_2\text{CO}_3] + [\text{CO}_{2(\text{aq})}]) / P_{\text{CO}_2}$$

Charge balance:  $[H_3O^+] + [BH^+] = [OH^-] + [HCO_3^-]$

Mass balance:  $[B]_o = [B] + [BH^+]$

$$K_{a1}^* = ([H_3O^+][HCO_3^-]) / (K_H P_{CO2})$$

$$K_{a1}^* K_H P_{CO2} = [H_3O^+][HCO_3^-]$$

$$[HCO_3^-] = K_{a1}^* K_H P_{CO2} / [H_3O^+]$$

$$[B] = K_{aH} [BH^+] / [H_3O^+]$$

$$[B]_o = [BH^+] + K_{aH} [BH^+] / [H_3O^+]$$

$$[B]_o = [BH^+] (1 + K_{aH} / [H_3O^+])$$

$$[B]_o = [BH^+] ([H_3O^+] / [H_3O^+] + K_{aH} / [H_3O^+])$$

$$[B]_o = [BH^+] ([H_3O^+] + K_{aH}) / [H_3O^+]$$

$$[BH^+] = [H_3O^+] [B]_o / ([H_3O^+]_{aq} + K_{aH})$$

$$[H_3O^+] + [BH^+] = [OH^-] + [HCO_3^-]$$

$$[H_3O^+] + [H_3O^+] [B]_o / ([H_3O^+] + K_{aH}) = K_w / [H_3O^+] + K_{a1}^* K_H P_{CO2} / [H_3O^+]$$

multiply both sides by  $([H_3O^+] + K_{aH})$

$$[H_3O^+] ([H_3O^+] + K_{aH}) + [H_3O^+] [B]_o = ([H_3O^+] + K_{aH}) K_w / [H_3O^+] + ([H_3O^+] + K_{aH}) K_{a1}^* K_H P_{CO2} / [H_3O^+]$$

$$[H_3O^+]^2 + [H_3O^+] K_{aH} + [H_3O^+] [B]_o = K_w + K_{aH} K_w / [H_3O^+] + K_{a1}^* K_H P_{CO2} + K_{aH} K_{a1}^* K_H P_{CO2} / [H_3O^+]$$

$$[H_3O^+]^2 + [H_3O^+] (K_{aH} + [B]_o) = K_w + K_{a1}^* K_H P_{CO2} + K_{aH} K_w / [H_3O^+] + K_{aH} K_{a1}^* K_H P_{CO2} / [H_3O^+]$$

multiply both sides by  $[H_3O^+]$

$$[H_3O^+]^3 + [H_3O^+]^2 (K_{aH} + [B]_o) = (K_w + K_{a1}^* K_H P_{CO2}) [H_3O^+] + K_{aH} K_w + K_{aH} K_{a1}^* K_H P_{CO2}$$

$$[H_3O^+]^3 + [H_3O^+]^2 (K_{aH} + [B]_o) - (K_w + K_{a1}^* K_H P_{CO2}) [H_3O^+] - K_{aH} K_w - K_{aH} K_{a1}^* K_H P_{CO2} = 0$$

which is equation 11

if  $P_{CO2} = 0$  then this simplifies to

$$[H_3O^+]^3 + [H_3O^+]^2 (K_{aH} + [B]_o) - K_w [H_3O^+] - K_{aH} K_w = 0$$

which is equation 9

## 2. Derivations of equations in Scenario 2

### 2.1 Derivation of equation 12

$$K_{aH} = \frac{[B][H_3O^+]}{[BH^+]}$$

$$K_w = [H_3O^+]_{aq} [OH^-]_{aq}$$

charge balance in water:

$$[BH^+] + [H_3O^+] = [OH^-]$$

$$[BH^+] = [OH^-] - [H_3O^+]$$

$$[BH^+] = K_w / [H_3O^+] - [H_3O^+]$$

solubility of base =  $S = [B] + [BH^+]$

$$S = [B] + [B][H_3O^+] / K_{aH}$$

$$S = [B] (1 + [H_3O^+] / K_{aH})$$

$$S = S_0 (1 + 10^{-pH} / 10^{-pK_{aH}})$$

$$\log S = \log S_0 + \log (1 + 10^{pK_{aH} - pH})$$

### 2.2 Derivation of equation 13

$$K_b = [BH^+] [OH^-] / [B]$$

$$K_w = [H^+] [HO^-]$$

Charge balance:  $[H^+] + [BH^+] = [OH^-]$

$$K_w / [OH^-] + [BH^+] = [OH^-]$$

$$K_w + [BH^+] [OH^-] = [OH^-]^2$$

$$K_w + [B] K_b = [OH^-]^2$$

$$[OH^-] = (K_w + [B] K_b)^{0.5}$$

$S_0 = [B]$  at saturation

$$\begin{aligned} S_{aq} &= [B] + [BH^+] = S_0 + K_b [B] / [OH^-] \\ &= S_0 ( 1 + K_b / (K_w + [B] K_b)^{0.5} ) \\ &= S_0 ( 1 + K_b / (K_w + S_0 K_b)^{0.5} ) \end{aligned}$$

### 2.3 Derivation of equation 16

$$K_{aH} = \frac{[B][H_3O^+]}{[BH^+]}$$

$$\begin{aligned} \text{fraction protonated} &= n_{BH^+}/n_{B0} = [BH^+]/[B]_0 \\ &= [B][H_3O^+]/K_{aH}[B]_0 \end{aligned}$$

$$\text{fraction protonated} = \frac{S_0[H_3O^+]}{[B]_0 K_{aH}}$$

$$\% \text{ protonation} = \frac{S_0[H_3O^+]}{[B]_0 K_{aH}} \times 100\%$$

### 2.4 Derivation of equation 17

at system midpoint: % protonation = 50%

$$0.5 = S_0[H_3O^+]/[B]_0 K_{aH}$$

$$[B]_0 K_{aH} / 2S_0 = [H_3O^+]$$

$$\log[H_3O^+] = \log K_{aH} + \log([B]_0 / 2S_0)$$

$$\text{pH} = \text{p}K_{aH} - \log([B]_0 / 2S_0)$$

### 2.5 Derivation of equation 18

$$K_{aH} = \frac{[B][H_3O^+]}{[BH^+]}$$

$$K_w = [H_3O^+] [OH^-]$$

charge balance in water:

$$[BH^+] + [H_3O^+] = [OH^-]$$

$$[BH^+] = [OH^-] - [H_3O^+]$$

$$[BH^+] = K_w/[H_3O^+] - [H_3O^+]$$

$$S_0 = [B]$$

$$[BH^+] = S_0[H_3O^+]/K_{aH}$$

$$K_w/[H_3O^+] - [H_3O^+] = S_0[H_3O^+]/K_{aH}$$

$$K_w - [H_3O^+]^2 = S_0[H_3O^+]^2/K_{aH}$$

$$K_w = [H_3O^+]^2 + S_0[H_3O^+]^2/K_{aH}$$

$$K_w = [H_3O^+]^2 (1 + S_0/K_{aH})$$

$$[H_3O^+]^2 = K_w / (1 + S_0/K_{aH})$$

$$[H_3O^+] = K_w^{0.5} / (1 + S_0/K_{aH})^{0.5}$$

## 2.6 Derivation of equation 20 (pH in the presence of CO<sub>2</sub>)

Assume that there is some precipitated neutral B and no precipitated salt.

$$S_0 = [B]$$

$$K_{aH} = [B][H_3O^+]/[BH^+] = S_0[H_3O^+]/[BH^+]$$

$$K_w = [H_3O^+][OH^-]$$

$$\text{charge balance in water: } [BH^+] + [H_3O^+] = [OH^-] + [HCO_3^-]$$

$$\text{mass balance: } [B]_0 = [BH^+] + [B] + n_{ppt}/V$$

or

$$[B]_0 = [BH^+] + S_0 + n_{ppt}/V$$

$$\text{fraction protonated} = n_{BH^+}/n_{B0} = [BH^+]/[B]_0$$

$$K_H = [H_2CO_3^*]/P_{CO2}$$

$$K_{a1}^* = [HCO_3^-][H_3O^+]/[H_2CO_3^*]$$

$$K_{a1}^* K_H = [HCO_3^-][H_3O^+]/P_{CO2}$$

$$K_{a1}^* K_H P_{CO2} = [HCO_3^-][H_3O^+]$$

$$[BH^+] + [H_3O^+] = [OH^-] + [HCO_3^-]$$

$$S_0[H_3O^+]/K_{aH} + [H_3O^+] = K_w/[H_3O^+] + K_{a1}^* K_H P_{CO2}/[H_3O^+]$$

$$[H_3O^+](1 + S_0/K_{aH}) = (K_w + K_{a1}^* K_H P_{CO2})/[H_3O^+]$$

$$[H_3O^+]^2 = (K_w + K_{a1}^* K_H P_{CO2})/(1 + S_0/K_{aH})$$

$$[H_3O^+] = \sqrt{\frac{K_w + K_{a1}^* K_H P_{CO2}}{1 + S_0/K_{aH}}}$$

## 2.7 Derivation of equation 21 (% protonation in presence of CO<sub>2</sub>)

$$K_{aH} = S_0[H_3O^+]/[BH^+]$$

$$\text{fraction protonated} = [BH^+]/[B]_0 = S_0[H_3O^+]/[B]_0 K_{aH}$$

$$\text{fraction protonated} = \frac{S_0 \sqrt{\frac{K_w + K_{a1}^* K_H P_{CO2}}{1 + S_0/K_{aH}}}}{[B]_0 K_{aH}}$$

$$\% \text{ protonation} = \frac{S_0 \sqrt{\frac{K_w + K_{a1}^* K_H P_{CO2}}{1 + S_0/K_{aH}}}}{[B]_0 K_{aH}} \times 100\%$$

or

$$[B]_0 = \frac{S_0 \sqrt{\frac{K_w + K_{a1}^* K_H P_{CO2}}{1 + S_0/K_{aH}}}}{P_{prot} K_{aH}}$$

where  $P_{prot}$  is the fraction protonated

### 3. Derivations of equations in Scenario 3

#### 3.1 Derivation of equation 25

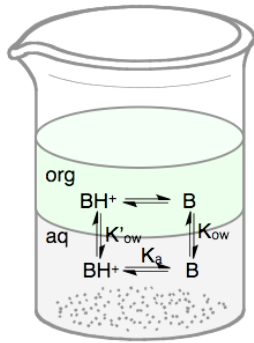

$$K_{aH} = \frac{[B]_{aq}[H_3O^+]_{aq}}{[BH^+]_{aq}}$$

$$K_P = \frac{[B]_{org}}{[B]_{aq}}$$

$$K'_P = \frac{[BH^+]_{org}}{[BH^+]_{aq}}$$

$$D = \frac{[B]_{org} + [BH^+]_{org}}{[B]_{aq} + [BH^+]_{aq}}$$

$$D = \frac{K_P[B]_{aq} + K'_P[BH^+]_{aq}}{[B]_{aq} + [B]_{aq}[H_3O^+]_{aq}/K_{aH}}$$

$$D = \frac{K_P[B]_{aq} + [B]_{aq}K'_P[H_3O^+]_{aq}/K_{aH}}{[B]_{aq} + [B]_{aq}[H_3O^+]_{aq}/K_{aH}}$$

Multiply top and bottom by  $K_{aH}/[B]_{aq}$

$$D = \frac{K_P K_{aH} + K'_P [H_3O^+]_{aq}}{K_{aH} + [H_3O^+]_{aq}}$$

#### 3.2 Derivation of equation 26

$$K_{aH} = \frac{[B]_{aq}[H_3O^+]_{aq}}{[BH^+]_{aq}}$$

$$K_P = \frac{[B]_{org}}{[B]_{aq}}$$

$$K'_P = \frac{[BH^+]_{org}}{[BH^+]_{aq}}$$

$$\text{initial moles of base} = n_0 = [B]_{org}V_{org} + [B]_{aq}V_{aq} + [BH^+]_{org}V_{org} + [BH^+]_{aq}V_{aq}$$

$$V_{rat} = V_{org}/V_{aq}$$

$$\text{fraction protonated} = \frac{n_{BH^+}}{n_0} = \frac{[BH^+]_{org}V_{org} + [BH^+]_{aq}V_{aq}}{[B]_{org}V_{org} + [B]_{aq}V_{aq} + [BH^+]_{org}V_{org} + [BH^+]_{aq}V_{aq}}$$

$$\begin{aligned}
&= \frac{[\text{BH}^+]_{\text{aq}} K'_P V_{\text{org}} + [\text{B}]_{\text{aq}} [\text{H}_3\text{O}^+]_{\text{aq}} V_{\text{aq}} / K_{\text{aH}}}{[\text{B}]_{\text{aq}} K_P V_{\text{org}} + [\text{B}]_{\text{aq}} V_{\text{aq}} + [\text{BH}^+]_{\text{aq}} K'_P V_{\text{org}} + [\text{B}]_{\text{aq}} [\text{H}_3\text{O}^+]_{\text{aq}} V_{\text{aq}} / K_{\text{aH}}} \\
&= \frac{[\text{B}]_{\text{aq}} [\text{H}_3\text{O}^+]_{\text{aq}} K'_P V_{\text{org}} / K_{\text{aH}} + [\text{B}]_{\text{aq}} [\text{H}_3\text{O}^+]_{\text{aq}} V_{\text{aq}} / K_{\text{aH}}}{[\text{B}]_{\text{aq}} K_P V_{\text{org}} + [\text{B}]_{\text{aq}} V_{\text{aq}} + [\text{B}]_{\text{aq}} [\text{H}_3\text{O}^+]_{\text{aq}} K'_P V_{\text{org}} / K_{\text{aH}} + [\text{B}]_{\text{aq}} [\text{H}_3\text{O}^+]_{\text{aq}} V_{\text{aq}} / K_{\text{aH}}}
\end{aligned}$$

Cancel out  $[\text{B}]_{\text{aq}}$  and multiply top and bottom by  $K_{\text{aH}}/V_{\text{aq}}$

$$\text{fraction protonated} = \frac{[\text{H}_3\text{O}^+]_{\text{aq}} (K'_P V_{\text{rat}} + 1)}{K_{\text{aH}} (K_P V_{\text{rat}} + 1) + [\text{H}_3\text{O}^+]_{\text{aq}} (K'_P V_{\text{rat}} + 1)}$$

$$\% \text{ protonation} = \frac{[\text{H}_3\text{O}^+]_{\text{aq}} (K'_P V_{\text{rat}} + 1)}{K_{\text{aH}} (K_P V_{\text{rat}} + 1) + [\text{H}_3\text{O}^+]_{\text{aq}} (K'_P V_{\text{rat}} + 1)} \times 100\%$$

### 3.3 Derivation of equation 27

at the midpoint, % protonation = 50%. Put this into equation 20 and rearrange.

$$\begin{aligned}
K_{\text{aH}} (K_P V_{\text{rat}} + 1) + [\text{H}_3\text{O}^+]_{\text{aq}} (K'_P V_{\text{rat}} + 1) &= 2[\text{H}_3\text{O}^+]_{\text{aq}} (K'_P V_{\text{rat}} + 1) \\
K_{\text{aH}} (K_P V_{\text{rat}} + 1) &= [\text{H}_3\text{O}^+]_{\text{aq}} (K'_P V_{\text{rat}} + 1) \\
[\text{H}_3\text{O}^+]_{\text{aq}} &= K_{\text{aH}} (K_P V_{\text{rat}} + 1) / (K'_P V_{\text{rat}} + 1) \\
\log[\text{H}_3\text{O}^+]_{\text{aq}} &= \log K_{\text{aH}} + \log(K_P V_{\text{rat}} + 1) - \log(K'_P V_{\text{rat}} + 1) \\
\text{pH} &= \text{p}K_{\text{aH}} - \log_{10}(K_P V_{\text{rat}} + 1) + \log_{10}(K'_P V_{\text{rat}} + 1)
\end{aligned}$$

### 3.4 Derivation of equation 28

$$K_{\text{aH}} = \frac{[\text{B}]_{\text{aq}} [\text{H}_3\text{O}^+]_{\text{aq}}}{[\text{BH}^+]_{\text{aq}}}$$

$$K_P = \frac{[\text{B}]_{\text{org}}}{[\text{B}]_{\text{aq}}}$$

$$K'_P = \frac{[\text{BH}^+]_{\text{org}}}{[\text{BH}^+]_{\text{aq}}}$$

$$\text{initial moles of base} = n_0 = [\text{B}]_{\text{org}} V_{\text{org}} + [\text{B}]_{\text{aq}} V_{\text{aq}} + [\text{BH}^+]_{\text{org}} V_{\text{org}} + [\text{BH}^+]_{\text{aq}} V_{\text{aq}}$$

$$K_w = [\text{H}_3\text{O}^+]_{\text{aq}} [\text{OH}^-]_{\text{aq}}$$

$$V_{\text{rat}} = V_{\text{org}} / V_{\text{aq}}$$

charge balance in water:

$$[\text{BH}^+]_{\text{aq}} + [\text{H}_3\text{O}^+]_{\text{aq}} = [\text{OH}^-]_{\text{aq}}$$

$$[\text{BH}^+]_{\text{aq}} = [\text{OH}^-]_{\text{aq}} - [\text{H}_3\text{O}^+]_{\text{aq}}$$

$$[\text{BH}^+]_{\text{aq}} = K_w / [\text{H}_3\text{O}^+]_{\text{aq}} - [\text{H}_3\text{O}^+]_{\text{aq}}$$

To save space, we will use " $\text{H}^+$ " to represent " $\text{H}_3\text{O}^+$ " and note that  $[\text{H}^+]$  is the aqueous phase concentration of  $\text{H}_3\text{O}^+$ .

$$[\text{B}]_0 = [\text{B}]_{\text{org}} V_{\text{rat}} + [\text{B}]_{\text{aq}} + [\text{BH}^+]_{\text{org}} V_{\text{rat}} + [\text{BH}^+]_{\text{aq}}$$

$$[\text{B}]_0 = [\text{B}]_{\text{aq}} K_P V_{\text{rat}} + [\text{B}]_{\text{aq}} + [\text{BH}^+]_{\text{aq}} K'_P V_{\text{rat}} + [\text{BH}^+]_{\text{aq}}$$

$$[\text{B}]_0 = [\text{B}]_{\text{aq}} (K_P V_{\text{rat}} + 1) + [\text{BH}^+]_{\text{aq}} (K'_P V_{\text{rat}} + 1)$$

$$[\text{B}]_0 = K_{\text{aH}} [\text{BH}^+]_{\text{aq}} (K_P V_{\text{rat}} + 1) / [\text{H}^+] + [\text{BH}^+]_{\text{aq}} (K'_P V_{\text{rat}} + 1)$$

$$[\text{B}]_0 = K_{\text{aH}} (K_w / [\text{H}^+]_{\text{aq}} - [\text{H}^+]_{\text{aq}}) (K_P V_{\text{rat}} + 1) / [\text{H}^+] + (K_w / [\text{H}^+]_{\text{aq}} - [\text{H}^+]_{\text{aq}}) (K'_P V_{\text{rat}} + 1)$$

$$0 = K_{\text{aH}} (K_w / [\text{H}^+]_{\text{aq}} - [\text{H}^+]_{\text{aq}}) (K_P V_{\text{rat}} + 1) / [\text{H}^+] + (K_w / [\text{H}^+]_{\text{aq}} - [\text{H}^+]_{\text{aq}}) (K'_P V_{\text{rat}} + 1) - [\text{B}]_0$$

$$0 = (K_{\text{aH}} K_w / [\text{H}^+]^2 - K_{\text{aH}}) (K_P V_{\text{rat}} + 1) + (K_w / [\text{H}^+]_{\text{aq}} - [\text{H}^+]_{\text{aq}}) (K'_P V_{\text{rat}} + 1) - [\text{B}]_0$$

multiply by  $[H^+]^2$

$$\begin{aligned}
 0 &= (K_{aH}K_w - K_{aH}[H^+]^2)(K_P V_{rat} + 1) + (K_w[H^+] - [H^+]^3)(K'_P V_{rat} + 1) - [B]_0[H^+]^2 \\
 0 &= K_{aH}K_w(K_P V_{rat} + 1) - K_{aH}[H^+]^2(K_P V_{rat} + 1) + K_w[H^+](K'_P V_{rat} + 1) - [H^+]^3(K'_P V_{rat} + 1) - [B]_0[H^+]^2 \\
 0 &= -[H^+]^3(K'_P V_{rat} + 1) - K_{aH}[H^+]^2(K_P V_{rat} + 1) - [B]_0[H^+]^2 + K_w[H^+](K'_P V_{rat} + 1) + K_{aH}K_w(K_P V_{rat} + 1) \\
 0 &= -[H^+]^3(K'_P V_{rat} + 1) - [H^+]^2\{K_{aH}(K_P V_{rat} + 1) + [B]_0\} + [H^+]K_w(K'_P V_{rat} + 1) + K_{aH}K_w(K_P V_{rat} + 1) \\
 0 &= -[H^+]^3(K'_P V_{rat} + 1) - [H^+]^2\{K_{aH}K_P V_{rat} + K_a + [B]_0\} + [H^+]K_w(K'_P V_{rat} + 1) + K_{aH}K_w(K_P V_{rat} + 1) \\
 0 &= [H^+]^3(K'_P V_{rat} + 1) + [H^+]^2\{K_{aH}K_P V_{rat} + K_a + [B]_0\} - [H^+]K_w(K'_P V_{rat} + 1) - K_{aH}K_w(K_P V_{rat} + 1)
 \end{aligned}$$

## Derivation of equation 29

$$K_{aH} = \frac{[B]_{aq}[H_3O^+]_{aq}}{[BH^+]_{aq}}$$

$$K_P = \frac{[B]_{org}}{[B]_{aq}}$$

$$K'_P = \frac{[BH^+]_{org}}{[BH^+]_{aq}}$$

$$K^*_{a1} = [H_3O^+]_{aq} [HCO_3^-]_{aq} / ([H_2CO_3] + [CO_{2(aq)}])$$

$$K_H = ([H_2CO_3] + [CO_{2(aq)}]) / P_{CO_2}$$

$$\text{initial moles of base} = n_0 = [B]_{org}V_{org} + [B]_{aq}V_{aq} + [BH^+]_{org}V_{org} + [BH^+]_{aq}V_{aq}$$

$$K_w = [H_3O^+]_{aq}[OH^-]_{aq}$$

$$V_{rat} = V_{org}/V_{aq}$$

charge balance in water:

$$[BH^+]_{aq} + [H_3O^+]_{aq} = [OH^-]_{aq} + [HCO_3^-]_{aq}$$

$$[BH^+]_{aq} = [OH^-]_{aq} + [HCO_3^-]_{aq} - [H_3O^+]_{aq}$$

$$[BH^+]_{aq} = K_w/[H_3O^+]_{aq} + [HCO_3^-]_{aq} - [H_3O^+]_{aq}$$

$$[BH^+]_{aq} = K_w/[H_3O^+]_{aq} + K^*_{a1}([H_2CO_3] + [CO_{2(aq)}])/[H_3O^+]_{aq} - [H_3O^+]_{aq}$$

To save space, we will use “ $H^+$ ” to represent “ $H_3O^+$ ” and note that  $[H^+]$  is the aqueous phase concentration of  $H_3O^+$ .

$$[B]_0 = [B]_{org}V_{rat} + [B]_{aq} + [BH^+]_{org}V_{rat} + [BH^+]_{aq}$$

$$[B]_0 = [B]_{aq}K_P V_{rat} + [B]_{aq} + [BH^+]_{aq}K'_P V_{rat} + [BH^+]_{aq}$$

$$[B]_0 = [B]_{aq}(K_P V_{rat} + 1) + [BH^+]_{aq}(K'_P V_{rat} + 1)$$

$$[B]_0 = K_{aH}[BH^+]_{aq}(K_P V_{rat} + 1)/[H^+] + [BH^+]_{aq}(K'_P V_{rat} + 1)$$

$$[B]_0 = K_{aH}(K_w/[H^+] + K^*_{a1}([H_2CO_3] + [CO_{2(aq)}])/[H^+] - [H^+])(K_P V_{rat} + 1)/[H^+] + (K_w/[H^+] +$$

$$K^*_{a1}([H_2CO_3] + [CO_{2(aq)}])/[H^+] - [H^+])(K'_P V_{rat} + 1)$$

$$[B]_0 = K_{aH}(K_w/[H^+] + K^*_{a1}K_H P_{CO_2}/[H^+] - [H^+])(K_P V_{rat} + 1)/[H^+] + (K_w/[H^+] + K^*_{a1}K_H P_{CO_2}/[H^+] - [H^+])(K'_P V_{rat} + 1)$$

$$0 = K_{aH}(K_w/[H^+] + K^*_{a1}K_H P_{CO_2}/[H^+] - [H^+])(K_P V_{rat} + 1)/[H^+] + (K_w/[H^+] + K^*_{a1}K_H P_{CO_2}/[H^+] - [H^+])(K'_P V_{rat} + 1) - [B]_0$$

$$0 = (K_{aH}K_w/[H^+]^2 + K_{aH}K^*_{a1}K_H P_{CO_2}/[H^+]^2 - K_{aH})(K_P V_{rat} + 1) + (K_w/[H^+] + K^*_{a1}K_H P_{CO_2}/[H^+] - [H^+])(K'_P V_{rat} + 1) - [B]_0$$

multiply by  $[H^+]^2$

$$0 = (K_{aH}K_w + K_{aH}K^*_{a1}K_H P_{CO_2} - K_{aH}[H^+]^2)(K_P V_{rat} + 1) + (K_w[H^+] + K^*_{a1}K_H P_{CO_2}[H^+] - [H^+]^3)(K'_P V_{rat} + 1) - [B]_0[H^+]^2$$

$$0 = K_{aH}K_w(K_P V_{rat} + 1) + K_{aH}K^*_{a1}K_H P_{CO_2}(K_P V_{rat} + 1) - K_{aH}[H^+]^2(K_P V_{rat} + 1) + K_w[H^+](K'_P V_{rat} + 1) + K_{aH}K^*_{a1}K_H P_{CO_2}[H^+](K'_P V_{rat} + 1) - [H^+]^3(K'_P V_{rat} + 1) - [B]_0[H^+]^2$$



$$\begin{aligned}
0 &= -[H^+]^3(K'_P V_{rat} + 1) - K_{aH}[H^+]^2(K_P V_{rat} + 1) - [B]_0[H^+]^2 + K_w[H^+](K'_P V_{rat} + 1) + \\
&K_{aH}K_{a1}^*K_{HP_{CO2}}[H^+](K'_P V_{rat} + 1) + K_{aH}K_w(K_P V_{rat} + 1) + K_{aH}K_{a1}^*K_{HP_{CO2}}(K_P V_{rat} + 1) \\
0 &= -[H^+]^3(K'_P V_{rat} + 1) - [H^+]^2\{K_{aH}(K_P V_{rat} + 1) + [B]_0\} + [H^+]\{K_w(K'_P V_{rat} + 1) + K_{aH}K_{a1}^*K_{HP_{CO2}}(K'_P V_{rat} + \\
&1)\} + K_{aH}K_w(K_P V_{rat} + 1) + K_{aH}K_{a1}^*K_{HP_{CO2}}(K_P V_{rat} + 1) \\
0 &= [H^+]^3(K'_P V_{rat} + 1) + [H^+]^2\{K_{aH}(K_P V_{rat} + 1) + [B]_0\} - [H^+]\{K_w(K'_P V_{rat} + 1) + K_{aH}K_{a1}^*K_{HP_{CO2}}(K'_P V_{rat} + \\
&1)\} - K_{aH}K_w(K_P V_{rat} + 1) - K_{aH}K_{a1}^*K_{HP_{CO2}}(K_P V_{rat} + 1)
\end{aligned}$$

## 4. Additional information concerning Scenario 1

### 4.1 Experimental Methods

The  $pK_{aH}$  values of DBU, 2-IME, and PYPO were experimentally determined as follows. A standard solution (0.1 M) of the compound in distilled water was titrated by 0.1 M HCl at 30 °C, and the pH was continuously recorded after addition of HCl. The  $pK_{aH}$  was taken as the pH at the half-equivalence point.

pH measurements of base solutions were performed in the following manner. Vials and centrifuge tubes were washed with deionized water (from a Millipore purification system, 18.2 MΩ) until the wash water had a pH within 0.2 units of 7. Stock solutions of base (10 mM, 100 mM, and 1000 mM) were prepared by accurately weighing out the base in a washed and dried vial, dissolved into DI water, and then transferred, with rinses, into a 100 mL glass volumetric flask. The contents of the volumetric flask were then diluted to volume. Three polypropylene 50 mL centrifuge tubes were washed with the DI water and then washed with a 5 mL portion of the base solution. Afterward, 25 mL of the base solution was added to each tube. Each tube of solution was covered with a screw cap and placed into a water bath with a temperature of 30.0 °C. All pH measurements were taken with a pH probe (Orion 4 Star benchtop pH meter equipped with an Orion Ag/AgCl glass probe (Thermo Scientific)). After 10 minutes, the tubes were removed from the bath and the pH of the each solution was measured 3 times in quick succession. The average measured pH of the solutions was determined by first calculating the average measured pH of each individual solution, then calculating the average pH between solutions. The tubes were placed back into the bath and CO<sub>2</sub> was passed slowly through the base solutions using a needle for sufficient time to obtain a constant pH. The necessary time varied with concentration and strength of the base, and was determined by measuring the pH every 20 min. A hole was created in the screw caps to prevent over-pressurization. The fully carbonated solutions were removed from the water bath and the pH of each solution was measured 3 times in quick succession. The average measured pH of the solutions was determined by first calculating the average measured pH of each individual solution, then calculating the average pH between solutions.

## 4.2 Tables of Theoretical Data

**Table S1.** The theoretical pH values for solutions of bases having specified  $pK_{aH}$  values and specified concentrations in water at 25 °C in the absence of  $CO_2$ .

| $[B]_0$ ,<br>mM | $pK_{aH}=5$ | $pK_{aH}=6$ | $pK_{aH}=7$ | $pK_{aH}=8$ | $pK_{aH}=9$ | $pK_{aH}=10$ | $pK_{aH}=11$ | $pK_{aH}=12$ | $pK_{aH}=13$ |
|-----------------|-------------|-------------|-------------|-------------|-------------|--------------|--------------|--------------|--------------|
| 0.001           | 7.02        | 7.14        | 7.46        | 7.80        | 7.97        | 8.00         | 8.00         | 8.00         | 8.00         |
| 0.01            | 7.15        | 7.51        | 7.98        | 8.43        | 8.80        | 8.96         | 8.99         | 8.99         | 9.00         |
| 0.1             | 7.525       | 8.00        | 8.49        | 8.98        | 9.43        | 9.79         | 9.97         | 9.99         | 9.99         |
| 1               | 8.00        | 8.5         | 8.99        | 9.498       | 9.98        | 10.43        | 10.79        | 10.96        | 10.99        |
| 10              | 8.505       | 8.99        | 9.50        | 9.99        | 10.49       | 10.98        | 11.43        | 11.79        | 11.96        |
| 100             | 9.00        | 9.50        | 9.99        | 10.50       | 10.99       | 11.49        | 11.98        | 12.43        | 12.84        |
| 1000            | 9.50        | 9.99        | 10.50       | 10.99       | 11.50       | 11.99        | 12.49        | 12.98        | 13.43        |

**Table S2.** The theoretical % protonation values for solutions of bases having specified  $pK_{aH}$  values and specified concentrations in water at 25 °C in the absence of  $CO_2$ .

| $[B]_0$ ,<br>mM | $pK_{aH}=5$ | $pK_{aH}=6$ | $pK_{aH}=7$ | $pK_{aH}=8$ | $pK_{aH}=9$ | $pK_{aH}=10$ | $pK_{aH}=11$ | $pK_{aH}=12$ | $pK_{aH}=13$ |
|-----------------|-------------|-------------|-------------|-------------|-------------|--------------|--------------|--------------|--------------|
| 0.001           | 1           | 7           | 26          | 61          | 92          | 99           | 100          | 100          | 100          |
| 0.01            | 0.70        | 3           | 10          | 27          | 62          | 92           | 99           | 100          | 100          |
| 0.1             | 0.30        | 1           | 3           | 10          | 27          | 62           | 92           | 99           | 100          |
| 1               | 0.1         | 0.32        | 1           | 3           | 10          | 27           | 62           | 92           | 99           |
| 10              | 0.03        | 0.1         | 0.32        | 1           | 3           | 10           | 27           | 62           | 92           |
| 100             | 0.01        | 0.03        | 0.1         | 0.32        | 1           | 3            | 10           | 27           | 62           |
| 1000            | 0.003       | 0.01        | 0.03        | 0.1         | 0.32        | 1            | 3            | 10           | 26           |

**Table S3.** The theoretical pH values for solutions of bases having specified  $pK_{aH}$  values and specified concentrations in water at 25 °C in the presence of 0.1 MPa  $CO_2$ .

| $[B]_0$ ,<br>mM | $pK_{aH}=5$ | $pK_{aH}=6$ | $pK_{aH}=7$ | $pK_{aH}=8$ | $pK_{aH}=9$ | $pK_{aH}=10$ | $pK_{aH}=11$ | $pK_{aH}=12$ | $pK_{aH}=13$ |
|-----------------|-------------|-------------|-------------|-------------|-------------|--------------|--------------|--------------|--------------|
| 0.001           | 3.91        | 3.91        | 3.91        | 3.91        | 3.91        | 3.91         | 3.91         | 3.91         | 3.91         |
| 0.01            | 3.93        | 3.93        | 3.93        | 3.93        | 3.93        | 3.93         | 3.93         | 3.93         | 3.93         |
| 0.1             | 4.06        | 4.08        | 4.08        | 4.08        | 4.08        | 4.08         | 4.08         | 4.08         | 4.08         |
| 1               | 4.67        | 4.79        | 4.8         | 4.8         | 4.8         | 4.8          | 4.8          | 4.8          | 4.8          |
| 10              | 5.33        | 5.7         | 5.8         | 5.8         | 5.8         | 5.8          | 5.8          | 5.8          | 5.8          |
| 100             | 5.88        | 6.3         | 6.7         | 6.8         | 6.8         | 6.8          | 6.8          | 6.8          | 6.8          |
| 1000            | 6.40        | 6.9         | 7.3         | 7.7         | 7.8         | 7.8          | 7.8          | 7.8          | 7.8          |

**Table S4.** The theoretical % protonation values for solutions of bases having specified  $pK_{aH}$  values and specified concentrations in water at 25 °C in the presence of 0.1 MPa of  $CO_2$ .

| $[B]_0$ , mM | $pK_{aH}=5$ | $pK_{aH}=6$ | $pK_{aH}=7$ | $pK_{aH}=8$ | $pK_{aH}=9$ | $pK_{aH}=10$ | $pK_{aH}=11$ | $pK_{aH}=12$ | $pK_{aH}=13$ |
|--------------|-------------|-------------|-------------|-------------|-------------|--------------|--------------|--------------|--------------|
| 0.001        | 94          | 99          | 100         | 100         | 100         | 100          | 100          | 100          | 100          |
| 0.01         | 92          | 99          | 100         | 100         | 100         | 100          | 100          | 100          | 100          |
| 0.1          | 90          | 98          | 100         | 100         | 100         | 100          | 100          | 100          | 100          |
| 1            | 68          | 94          | 99          | 100         | 100         | 100          | 100          | 100          | 100          |
| 10           | 32          | 69          | 94          | 99          | 100         | 100          | 100          | 100          | 100          |
| 100          | 12          | 32          | 69          | 94          | 99          | 100          | 100          | 100          | 100          |
| 1000         | 4           | 12          | 32          | 69          | 94          | 99           | 100          | 100          | 100          |

**Table S5.** The  $pK_{aH}$  values required for bases to have specific % protonation values in water at 25 °C under air or 0.1 MPa of  $CO_2$ , assuming that the base and its bicarbonate salt are both fully soluble.

| $[B]_0$ , mM | % P In absence of $CO_2$ |       |      |       | % P In presence of 0.1 MPa $CO_2$ |       |      |      |
|--------------|--------------------------|-------|------|-------|-----------------------------------|-------|------|------|
|              | 5                        | 10    | 20   | 30    | 95                                | 90    | 80   | 70   |
|              | $pK_{aH}$                |       |      |       | $pK_{aH}$                         |       |      |      |
| 0.001        | 5.83                     | 6.26  | 6.81 | 7.16  | 5.19                              | 4.879 | 4.52 | 4.28 |
| 0.01         | 6.44                     | 7.06  | 7.71 | 8.11  | 5.21                              | 4.88  | 4.53 | 4.29 |
| 0.1          | 7.5                      | 8.05  | 8.7  | 9.15  | 5.36                              | 5.02  | 4.65 | 4.41 |
| 1            | 8.43                     | 9.05  | 9.7  | 10.11 | 6.09                              | 5.74  | 5.34 | 5.05 |
| 10           | 9.43                     | 10.05 | 10.7 | 11.11 | 7.08                              | 6.73  | 6.33 | 6.04 |
| 100          | 10.43                    | 11.05 | 11.7 | 12.11 | 8.08                              | 7.73  | 7.33 | 7.04 |
| 1000         | 11.42                    | 12.05 | 12.7 | 13.11 | 9.08                              | 8.73  | 8.33 | 8.04 |

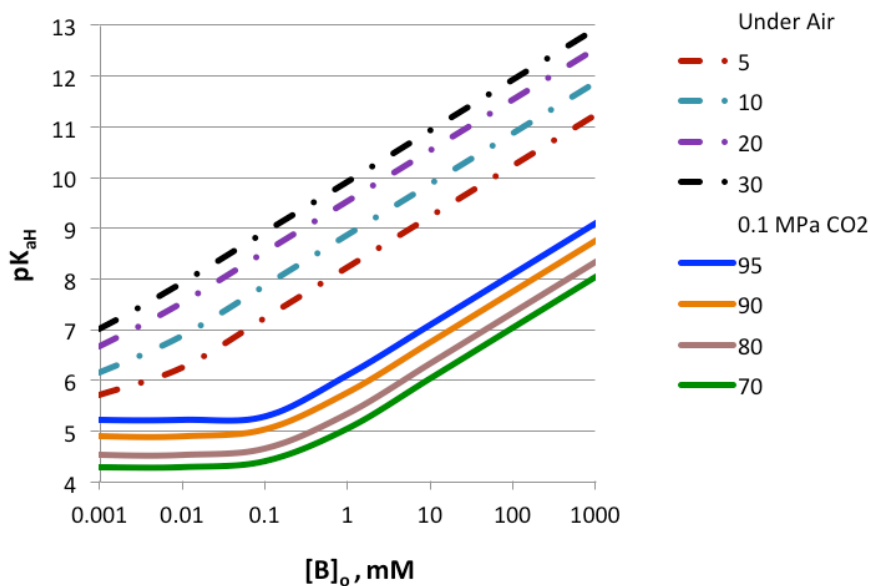

**Figure S1.** The  $pK_{aH}$  required for a base to have a specified % protonation when mixed with water at 30 °C. The dashed lines show the required  $pK_{aH}$  to obtain the specified % protonation in the absence of  $CO_2$ . The solid lines show the  $pK_{aH}$  required to obtain the specified % protonation values in the presence of 0.1 MPa of  $CO_2$ .

**Table S6.** The  $pK_{aH}$  values required for bases to have specific % protonation values in water at 30 °C under air or 0.1 MPa of  $CO_2$ , assuming that the base and its bicarbonate salt are both fully soluble.

| [B] <sub>0</sub> , mM | % P In absence of $CO_2$ |       |       |       | % P In presence of 0.1 MPa $CO_2$ |      |      |       |
|-----------------------|--------------------------|-------|-------|-------|-----------------------------------|------|------|-------|
|                       | 5                        | 10    | 20    | 30    | 95                                | 90   | 80   | 70    |
|                       | $pK_{aH}$                |       |       |       | $pK_{aH}$                         |      |      |       |
| 0.001                 | 5.73                     | 6.14  | 6.65  | 7.01  | 5.21                              | 4.89 | 4.53 | 4.3   |
| 0.01                  | 6.28                     | 6.89  | 7.54  | 7.95  | 5.23                              | 4.91 | 4.55 | 4.31  |
| 0.1                   | 7.26                     | 7.88  | 8.54  | 8.95  | 5.3                               | 5.05 | 4.68 | 4.43  |
| 1                     | 8.26                     | 8.88  | 9.54  | 9.94  | 6.12                              | 5.78 | 5.37 | 5.077 |
| 10                    | 9.26                     | 9.88  | 10.54 | 10.95 | 7.11                              | 6.77 | 6.36 | 6.065 |
| 100                   | 10.26                    | 10.88 | 11.54 | 11.95 | 8.11                              | 7.77 | 7.36 | 7.065 |
| 1000                  | 11.26                    | 11.88 | 12.54 | 12.95 | 9.11                              | 8.77 | 8.36 | 8.065 |

**Table S7.** The  $pK_{aH}$  values required for bases to have specific % protonation values in water at 60 °C under air or 0.1 MPa of  $CO_2$ , assuming that the base and its bicarbonate salt are both fully soluble.

| [B] <sub>0</sub> , mM | % P In absence of $CO_2$ |       |       |       | % P In presence of 0.1 MPa $CO_2$ |      |      |      |
|-----------------------|--------------------------|-------|-------|-------|-----------------------------------|------|------|------|
|                       | 5                        | 10    | 20    | 30    | 95                                | 90   | 80   | 70   |
|                       | $pK_{aH}$                |       |       |       | $pK_{aH}$                         |      |      |      |
| 0.001                 | 5.27                     | 5.63  | 6.05  | 6.35  | 5.32                              | 5    | 4.65 | 4.41 |
| 0.01                  | 5.56                     | 6.11  | 6.73  | 7.14  | 5.34                              | 5.02 | 4.66 | 4.43 |
| 0.1                   | 6.45                     | 7.1   | 7.72  | 8.19  | 5.54                              | 5.2  | 4.83 | 4.57 |
| 1                     | 7.45                     | 8.07  | 8.72  | 9.13  | 6.34                              | 5.99 | 5.59 | 5.3  |
| 10                    | 8.45                     | 9.07  | 9.72  | 10.13 | 7.34                              | 6.98 | 6.58 | 6.29 |
| 100                   | 9.45                     | 10.07 | 10.72 | 11.13 | 8.34                              | 7.99 | 7.59 | 7.29 |
| 1000                  | 10.45                    | 11.07 | 11.72 | 12.13 | 9.34                              | 8.99 | 8.58 | 8.29 |

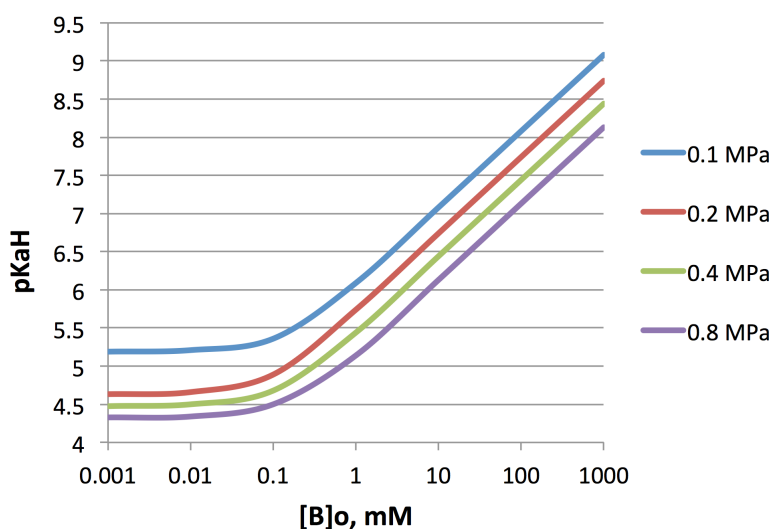

**Figure S2.** The  $pK_{aH}$  required for a base to have 95 % protonation when mixed with water at 25 °C under the specified pressure of  $CO_2$ .

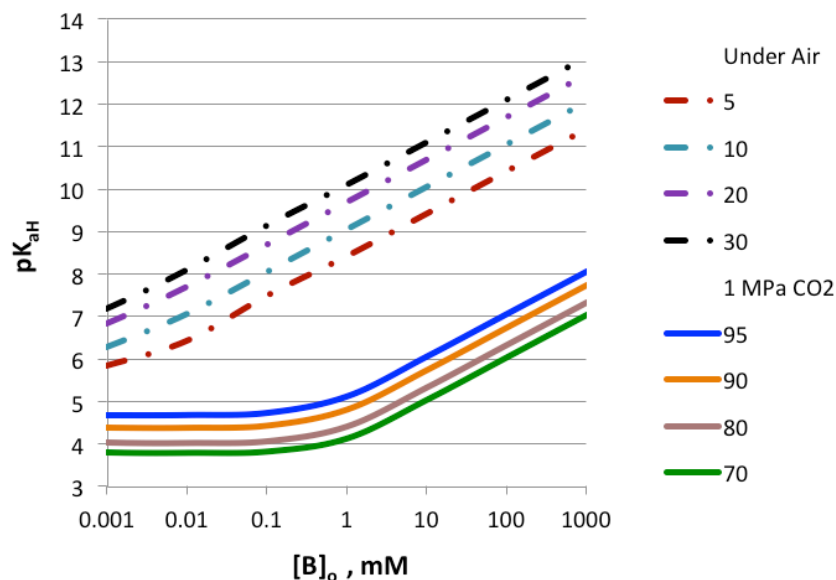

**Figure S3.** The  $pK_{aH}$  required for a base to have a specified % protonation when mixed with water at 25 °C. The dashed lines show the required  $pK_{aH}$  to obtain the specified % protonation in the absence of  $CO_2$ . The solid lines show the  $pK_{aH}$  required to obtain the specified % protonation values in the presence of 1 MPa (10 bar) of  $CO_2$ .

**Table S8.** The  $pK_{aH}$  values required for bases to have specific % protonation values in water at 25 °C under air or 1 MPa of  $CO_2$ , assuming that the base and its bicarbonate salt are both fully soluble.

| [B] <sub>0</sub> ,<br>mM | % P In absence of CO <sub>2</sub> |       |      |       | % P In presence of 1 MPa CO <sub>2</sub> |       |       |      |
|--------------------------|-----------------------------------|-------|------|-------|------------------------------------------|-------|-------|------|
|                          | 5                                 | 10    | 20   | 30    | 95                                       | 90    | 80    | 70   |
|                          | $pK_{aH}$                         |       |      |       | $pK_{aH}$                                |       |       |      |
| 0.001                    | 5.83                              | 6.26  | 6.81 | 7.16  | 4.69                                     | 4.365 | 4.012 | 3.78 |
| 0.01                     | 6.44                              | 7.06  | 7.71 | 8.11  | 4.7                                      | 4.37  | 4.02  | 3.79 |
| 0.1                      | 7.5                               | 8.05  | 8.7  | 9.15  | 4.75                                     | 4.42  | 4.06  | 3.82 |
| 1                        | 8.43                              | 9.05  | 9.7  | 10.11 | 5.14                                     | 4.8   | 4.41  | 4.13 |
| 10                       | 9.43                              | 10.05 | 10.7 | 11.11 | 6.08                                     | 5.73  | 5.33  | 5.04 |
| 100                      | 10.43                             | 11.05 | 11.7 | 12.11 | 7.08                                     | 6.73  | 6.33  | 6.04 |
| 1000                     | 11.42                             | 12.05 | 12.7 | 13.11 | 8.08                                     | 7.73  | 7.33  | 7.04 |

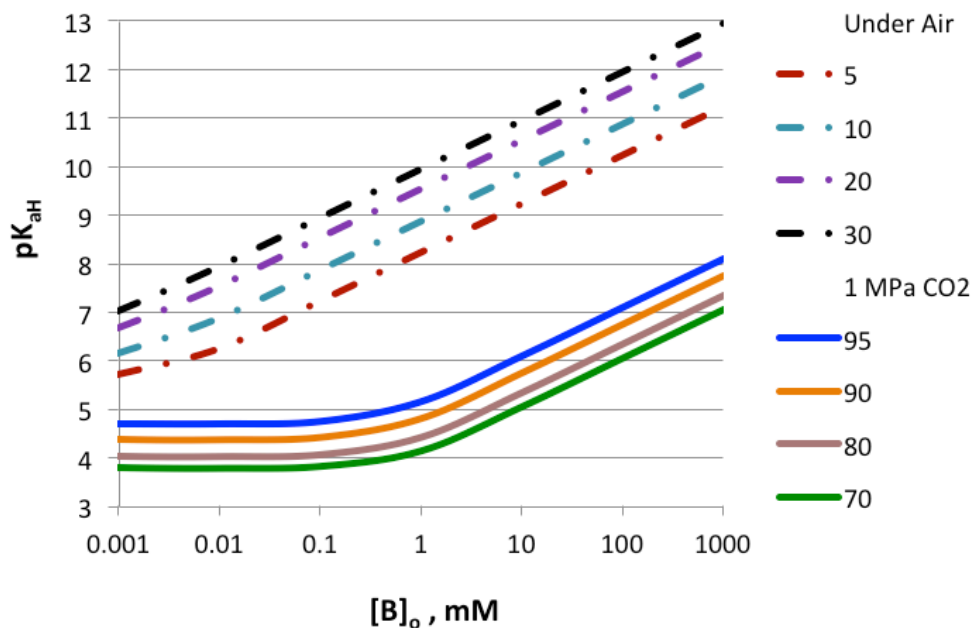

**Figure S4.** The  $pK_{aH}$  required for a base to have a specified % protonation when mixed with water at 30 °C. The dashed lines show the required  $pK_{aH}$  to obtain the specified % protonation in the absence of  $CO_2$ . The solid lines show the  $pK_{aH}$  required to obtain the specified % protonation values in the presence of 1 MPa (10 bar) of  $CO_2$ .

**Table S9.** The  $pK_{aH}$  values required for bases to have specific % protonation values in water at 30 °C under air or 1 MPa of  $CO_2$ , assuming that the base and its bicarbonate salt are both fully soluble.

| $[B]_0$ ,<br>mM | % P In absence of $CO_2$ |       |       |       | % P In presence of 1 MPa $CO_2$ |       |      |      |
|-----------------|--------------------------|-------|-------|-------|---------------------------------|-------|------|------|
|                 | 5                        | 10    | 20    | 30    | 95                              | 90    | 80   | 70   |
|                 | $pK_{aH}$                |       |       |       | $pK_{aH}$                       |       |      |      |
| 0.001           | 5.73                     | 6.14  | 6.65  | 7.01  | 4.71                            | 4.381 | 4.03 | 3.8  |
| 0.01            | 6.28                     | 6.89  | 7.54  | 7.95  | 4.71                            | 4.39  | 4.04 | 3.8  |
| 0.1             | 7.26                     | 7.88  | 8.54  | 8.95  | 4.76                            | 4.44  | 4.08 | 3.84 |
| 1               | 8.26                     | 8.88  | 9.54  | 9.95  | 5.17                            | 4.83  | 4.44 | 4.16 |
| 10              | 9.26                     | 9.88  | 10.54 | 10.95 | 6.11                            | 5.77  | 5.36 | 5.07 |
| 100             | 10.26                    | 10.88 | 11.54 | 11.95 | 7.11                            | 6.77  | 6.36 | 6.07 |
| 1000            | 11.26                    | 11.88 | 12.54 | 12.95 | 8.11                            | 7.77  | 7.36 | 7.07 |

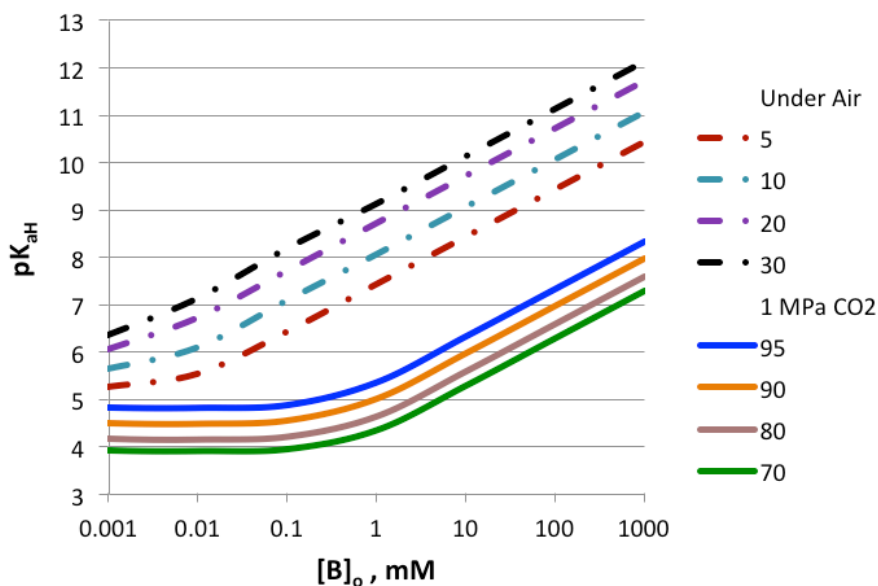

**Figure S5.** The  $pK_{aH}$  required for a base to have a specified % protonation when mixed with water at 60 °C. The dashed lines show the required  $pK_{aH}$  to obtain the specified % protonation in the absence of  $CO_2$ . The solid lines show the  $pK_{aH}$  required to obtain the specified % protonation values in the presence of 1 MPa of  $CO_2$ .

**Table S10.** The  $pK_{aH}$  values required for bases to have specific % protonation values in water at 60 °C under air or 1 MPa of  $CO_2$ , assuming that the base and its bicarbonate salt are both fully soluble.

| [B] <sub>0</sub> , mM | % P In absence of CO <sub>2</sub> |       |       |       | % P In presence of 1 MPa CO <sub>2</sub> |       |       |      |
|-----------------------|-----------------------------------|-------|-------|-------|------------------------------------------|-------|-------|------|
|                       | 5                                 | 10    | 20    | 30    | 95                                       | 90    | 80    | 70   |
|                       | $pK_{aH}$                         |       |       |       | $pK_{aH}$                                |       |       |      |
| 0.001                 | 5.27                              | 5.63  | 6.05  | 6.35  | 4.82                                     | 4.494 | 4.142 | 3.91 |
| 0.01                  | 5.56                              | 6.11  | 6.73  | 7.14  | 4.83                                     | 4.5   | 4.15  | 3.92 |
| 0.1                   | 6.45                              | 7.1   | 7.72  | 8.19  | 4.89                                     | 4.57  | 4.21  | 3.96 |
| 1                     | 7.45                              | 8.07  | 8.72  | 9.13  | 5.37                                     | 5.03  | 4.64  | 4.36 |
| 10                    | 8.45                              | 9.07  | 9.72  | 10.13 | 6.34                                     | 5.99  | 5.59  | 5.3  |
| 100                   | 9.45                              | 10.07 | 10.72 | 11.13 | 7.34                                     | 6.99  | 6.59  | 6.3  |
| 1000                  | 10.45                             | 11.07 | 11.72 | 12.13 | 8.34                                     | 7.99  | 7.59  | 7.3  |

## 5. Additional information concerning Scenario 2

### 5.1 Calculation of the $S_0$ value of CyNMe<sub>2</sub> in water

The solubility of CyNMe<sub>2</sub> in water is 1.4 wt% at 25 °C; this value was obtained by interpolation of the data of Stephenson.<sup>[1]</sup> This corresponds to a concentration of ~0.11 M if one assumes that a 1 kg solution has a volume of 1 L. Using equation 13, one can calculate that in this case  $S_0$  and  $S$  are identical to several digits. Therefore  $S_0 = \sim 0.11$  M

## 5.2 $pK_{aH}$ values required

**Table S11.** The theoretical pH values of the aqueous phase of a base/water mixture in the absence of  $CO_2$  as a function of the  $pK_{aH}$  of the base and  $[B]_0$ , the number of moles of base added to the system per litre of solution, at 25 °C. For each base,  $S_0$  is assumed to be 0.01 M.

| $[B]_0$ , mM | $pK_{aH}=5$ | $pK_{aH}=6$ | $pK_{aH}=7$ | $pK_{aH}=8$ | $pK_{aH}=9$ | $pK_{aH}=10$ | $pK_{aH}=11$ | $pK_{aH}=12$ | $pK_{aH}=13$ |
|--------------|-------------|-------------|-------------|-------------|-------------|--------------|--------------|--------------|--------------|
| 0.001        | 7.02        | 7.14        | 7.46        | 7.80        | 7.97        | 8.00         | 8.00         | 8.00         | 8.00         |
| 0.01         | 7.15        | 7.51        | 7.98        | 8.43        | 8.79        | 8.96         | 9.00         | 9.00         | 9.00         |
| 0.1          | 7.52        | 8.00        | 8.49        | 8.98        | 9.43        | 9.79         | 9.97         | 10.00        | 10.00        |
| 1            | 8.00        | 8.5         | 9.00        | 9.49        | 9.98        | 10.43        | 10.79        | 10.96        | 11.00        |
| 10           | 8.50        | 9.00        | 9.50        | 10.00       | 10.50       | 11           | 11.5         | 12           | 12.5         |
| 100          | 8.50        | 9.00        | 9.50        | 10.00       | 10.50       | 11           | 11.5         | 12           | 12.5         |
| 1000         | 8.50        | 9.00        | 9.50        | 10.00       | 10.50       | 11           | 11.5         | 12           | 12.5         |

**Table S12.** The  $pK_{aH}$  required for a base to have 5% protonation when mixed with water under air or a 95% protonation in water under 0.1 MPa  $CO_2$ , for incompletely soluble bases having an  $S_0$  value of 1, 10 or 100 mM, at 25 °C.

| $[B]_0$ , mM | P= 5% under air |              |             | P= 95% under 0.1 MPa $CO_2$ |              |             |
|--------------|-----------------|--------------|-------------|-----------------------------|--------------|-------------|
|              | $S_0= 100$ mM   | $S_0= 10$ mM | $S_0= 1$ mM | $S_0= 100$ mM               | $S_0= 10$ mM | $S_0= 1$ mM |
| 0.001        | 5.83            | 5.83         | 5.83        | 5.19                        | 5.19         | 5.19        |
| 0.01         | 6.44            | 6.44         | 6.44        | 5.21                        | 5.21         | 5.21        |
| 0.1          | 7.5             | 7.5          | 7.5         | 5.36                        | 5.36         | 5.36        |
| 1            | 8.43            | 8.43         | 8.4         | 6.09                        | 6.09         | 6.09        |
| 10           | 9.43            | 9.4          | 10.4        | 7.08                        | 7.08         | 7.08        |
| 100          | 10.4            | 11.4         | 12.4        | 8.08                        | 8.08         | 8.78        |
| 1000         | 12.4            | 13.4         | 14.4        | 9.08                        | 9.78         | 10.78       |



## 6. Additional information concerning Scenario 3

**Table S13.** The  $pK_{aH}$  values required for bases to have specific % protonation values in a biphasic water:organic mixture at 25 °C, assuming  $V_{rat}=0.5$  and  $\Delta\log K_p=2.8$ . These values were used to create the plot shown in Figure 16.

| [B] <sub>0</sub> , mM | 5% protonation under air      |              |              | 95% protonation under 1 bar CO <sub>2</sub> |              |              |
|-----------------------|-------------------------------|--------------|--------------|---------------------------------------------|--------------|--------------|
|                       | $pK_{aH}$ at given $\log K_p$ |              |              | $pK_{aH}$ at given $\log K_p$               |              |              |
|                       | $\log K_p=-1$                 | $\log K_p=1$ | $\log K_p=3$ | $\log K_p=-1$                               | $\log K_p=1$ | $\log K_p=3$ |
| 0.001                 | 5.87                          | 6.87         | 8.53         | 5.23                                        | 6.23         | 7.94         |
| 0.01                  | 6.48                          | 7.47         | 8.96         | 5.25                                        | 6.24         | 7.95         |
| 0.1                   | 7.46                          | 8.45         | 9.91         | 5.39                                        | 6.39         | 8.03         |
| 1                     | 8.46                          | 9.45         | 10.91        | 6.13                                        | 7.12         | 8.59         |
| 10                    | 9.46                          | 10.45        | 11.91        | 7.12                                        | 8.11         | 9.57         |
| 100                   | 10.46                         | 11.45        | 12.91        | 8.12                                        | 9.11         | 10.57        |
| 1000                  | 11.46                         | 12.45        | 13.91        | 9.12                                        | 10.11        | 11.57        |

## 7. References

- [1] R. M. Stephenson, *J. Chem. Eng. Data* **1993**, 38, 634.
